# Supplementary material for: Bridging the crystal and solution structure of a series of lipid-inspired ionic liquids
Source: Royal Society of Chemistry journal article supplement (doi:10.1039/d2sm01478e), 2023-01-01
Supplement: d2sm01478e1.pdf [file d2sm01478e1.pdf]

**Supplemental Information for:**

**Bridging the Crystal and Solution Structure of a Series of Lipid-Inspired Ionic Liquids**

Sophia A. Bellia,<sup>a</sup> Matthew Metzler,<sup>b</sup> Marissa Huynh,<sup>b</sup> Matthias Zeller,<sup>c</sup> Arsalan Mirjafari,<sup>\*,d</sup> Pamela Cohn,<sup>\*,b</sup>  
Patrick C. Hillesheim<sup>\*,a</sup>

<sup>a</sup> Department of Chemistry and Physics, Ave Maria University, Ave Maria, Florida, 34142, United States

<sup>b</sup> Chemistry Program, Stockton University, Galloway, New Jersey, 08205, United States

<sup>c</sup> Department of Chemistry, Purdue University, West Lafayette, Indiana, 47907, United States

<sup>d</sup> Department of Chemistry, State University of New York at Oswego, Oswego, New York 13126, United States

**\*Corresponding authors:**

[Patrick.Hillesheim@avemaria.edu](mailto:Patrick.Hillesheim@avemaria.edu);

[Pamela.Cohn@stockton.edu](mailto:Pamela.Cohn@stockton.edu);

[Arsalan.Mirjafari@oswego.edu](mailto:Arsalan.Mirjafari@oswego.edu)

|                                                                                                                | 2                                                                                                                                                                                                                                                           | 3                                                                                                                                   | 4                                                                                                                                 |
|----------------------------------------------------------------------------------------------------------------|-------------------------------------------------------------------------------------------------------------------------------------------------------------------------------------------------------------------------------------------------------------|-------------------------------------------------------------------------------------------------------------------------------------|-----------------------------------------------------------------------------------------------------------------------------------|
| <b>Crystal data</b>                                                                                            |                                                                                                                                                                                                                                                             |                                                                                                                                     |                                                                                                                                   |
| Chemical formula                                                                                               | Br·C <sub>21</sub> H <sub>41</sub> N <sub>2</sub>                                                                                                                                                                                                           | I·C <sub>21</sub> H <sub>41</sub> N <sub>2</sub>                                                                                    | C <sub>21</sub> H <sub>41</sub> N <sub>2</sub> ·C <sub>2</sub> F <sub>6</sub> NO <sub>4</sub> S <sub>2</sub>                      |
| <i>M<sub>r</sub></i>                                                                                           | 401.47                                                                                                                                                                                                                                                      | 448.46                                                                                                                              | 601.71                                                                                                                            |
| Crystal system, space group                                                                                    | Triclinic, <i>P</i> $\bar{1}$                                                                                                                                                                                                                               | Monoclinic, <i>P</i> 2 <sub>1</sub> / <i>c</i>                                                                                      | Triclinic, <i>P</i> $\bar{1}$                                                                                                     |
| Temperature (K)                                                                                                | 150                                                                                                                                                                                                                                                         | 150                                                                                                                                 | 150                                                                                                                               |
| <i>a</i> , <i>b</i> , <i>c</i> (Å)                                                                             | 6.715 (3), 7.437 (2), 24.396 (9)                                                                                                                                                                                                                            | 27.660 (9), 9.9680 (19), 8.2860 (16)                                                                                                | 7.0531 (2), 15.7762 (5), 27.1070 (9)                                                                                              |
| $\alpha$ (°)                                                                                                   | 86.48 (2),                                                                                                                                                                                                                                                  | 90                                                                                                                                  | 96.4858 (18)                                                                                                                      |
| $\beta$ (°)                                                                                                    | 82.188 (17)                                                                                                                                                                                                                                                 | 91.613 (12)                                                                                                                         | 95.9509 (17)                                                                                                                      |
| $\gamma$ (°)                                                                                                   | 68.301 (12)                                                                                                                                                                                                                                                 | 90                                                                                                                                  | 98.1327 (17)                                                                                                                      |
| <i>V</i> (Å <sup>3</sup> )                                                                                     | 1121.5 (7)                                                                                                                                                                                                                                                  | 2283.7 (10)                                                                                                                         | 2944.75 (16)                                                                                                                      |
| <i>Z</i>                                                                                                       | 2                                                                                                                                                                                                                                                           | 4                                                                                                                                   | 4                                                                                                                                 |
| Radiation type                                                                                                 | Cu <i>K</i> α                                                                                                                                                                                                                                               | Cu <i>K</i> α                                                                                                                       | Cu <i>K</i> α                                                                                                                     |
| $\mu$ (mm <sup>-1</sup> )                                                                                      | 2.51                                                                                                                                                                                                                                                        | 11.03                                                                                                                               | 2.28                                                                                                                              |
| Crystal size (mm)                                                                                              | 0.34 × 0.32 × 0.14                                                                                                                                                                                                                                          | 0.15 × 0.09 × 0.001                                                                                                                 | 0.19 × 0.16 × 0.05                                                                                                                |
| <b>Data collection</b>                                                                                         |                                                                                                                                                                                                                                                             |                                                                                                                                     |                                                                                                                                   |
| Diffractometer                                                                                                 | Bruker AXS D8 Quest diffractometer with PhotonIII_C14 charge-integrating and photon counting pixel array detector                                                                                                                                           | Bruker AXS D8 Quest diffractometer with PhotonIII_C14 charge-integrating and photon counting pixel array detector                   | Bruker AXS D8 Quest diffractometer with PhotonIII_C14 charge-integrating and photon counting pixel array detector                 |
| Absorption correction                                                                                          | Multi-scan <i>SADABS2016/2</i> (Bruker,2016/2) was used for absorption correction. <i>wR2(int)</i> was 0.0981 before and 0.0621 after correction. The Ratio of minimum to maximum transmission is 0.5417. The $\lambda/2$ correction factor is not present. | Multi-scan <i>SADABS 2016/2</i> : Krause, L., Herbst-Irmer, R., Sheldrick G.M. & Stalke D. (2015). <i>J. Appl. Cryst.</i> 48, 3-10. | Multi-scan <i>SADABS 2016/2</i> : Krause, L., Herbst-Irmer, R., Sheldrick G.M. & Stalke D., <i>J. Appl. Cryst.</i> 48 (2015) 3-10 |
| <i>T</i> <sub>min</sub> , <i>T</i> <sub>max</sub>                                                              | 0.179, 0.330                                                                                                                                                                                                                                                | 0.044, 0.169                                                                                                                        | 0.595, 0.754                                                                                                                      |
| No. of measured, independent and observed [ <i>I</i> > 2σ( <i>I</i> )] reflections                             | 9127, 4516, 4170                                                                                                                                                                                                                                            | 15434, 15434, 11213                                                                                                                 | 28387, 12039, 9026                                                                                                                |
| <i>R</i> <sub>int</sub>                                                                                        | 0.046                                                                                                                                                                                                                                                       | 0.104                                                                                                                               | 0.052                                                                                                                             |
| (sin $\theta/\lambda$ ) <sub>max</sub> (Å <sup>-1</sup> )                                                      | 0.638                                                                                                                                                                                                                                                       | 0.612                                                                                                                               | 0.638                                                                                                                             |
| <b>Refinement</b>                                                                                              |                                                                                                                                                                                                                                                             |                                                                                                                                     |                                                                                                                                   |
| <i>R</i> [ <i>F</i> <sup>2</sup> > 2σ( <i>F</i> <sup>2</sup> )], <i>wR</i> ( <i>F</i> <sup>2</sup> ), <i>S</i> | 0.063, 0.169, 1.20                                                                                                                                                                                                                                          | 0.097, 0.297, 1.11                                                                                                                  | 0.089, 0.261, 1.05                                                                                                                |
| No. of reflections                                                                                             | 4516                                                                                                                                                                                                                                                        | 15434                                                                                                                               | 12039                                                                                                                             |
| No. of parameters                                                                                              | 220                                                                                                                                                                                                                                                         | 223                                                                                                                                 | 1385                                                                                                                              |
| No. of restraints                                                                                              | -                                                                                                                                                                                                                                                           | -                                                                                                                                   | 2748                                                                                                                              |
| H-atom treatment                                                                                               | H-atom parameters constrained                                                                                                                                                                                                                               | H-atom parameters constrained                                                                                                       | H-atom parameters constrained                                                                                                     |
| $\Delta\rho_{\text{max}}$ , $\Delta\rho_{\text{min}}$ (e Å <sup>-3</sup> )                                     | 2.09, -0.60                                                                                                                                                                                                                                                 | 3.26, -1.66                                                                                                                         | 0.44, -0.34                                                                                                                       |

Table S1. Experimental details for the crystallographic studies.

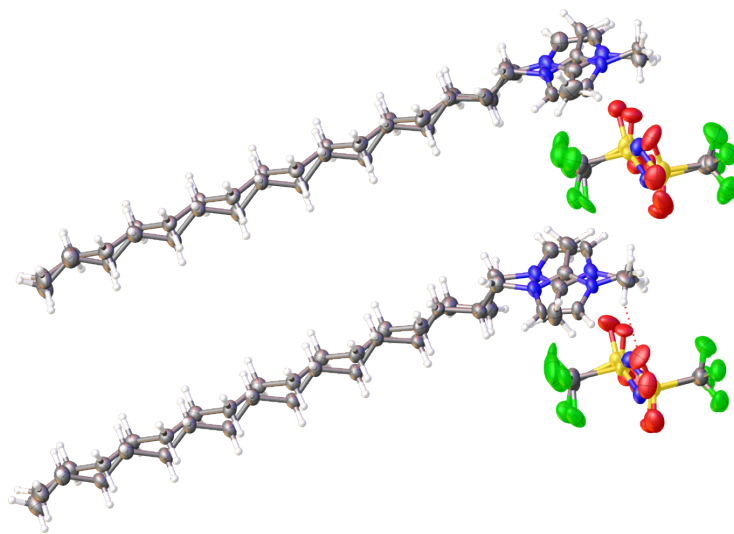

**A**

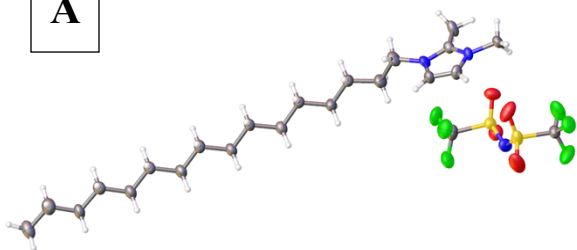

**B**

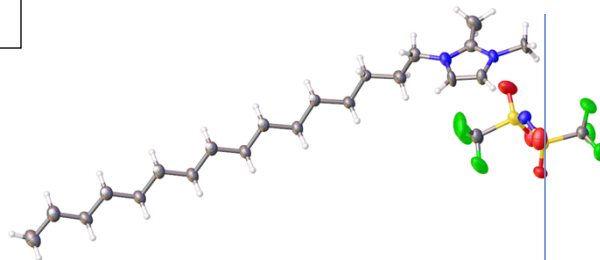

**C**

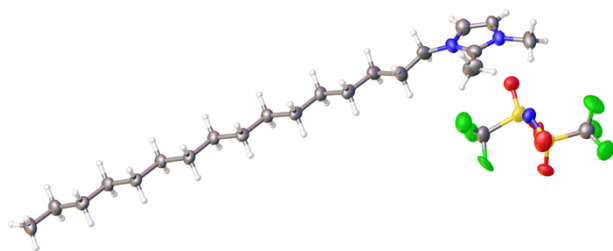

**D**

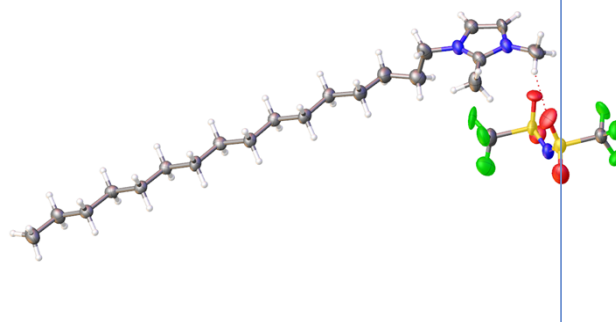

**Figure S1.** (top) The asymmetric unit of compound 4 shown with disorder. (bottom) The individual cation/anion pairs in the asymmetric unit.

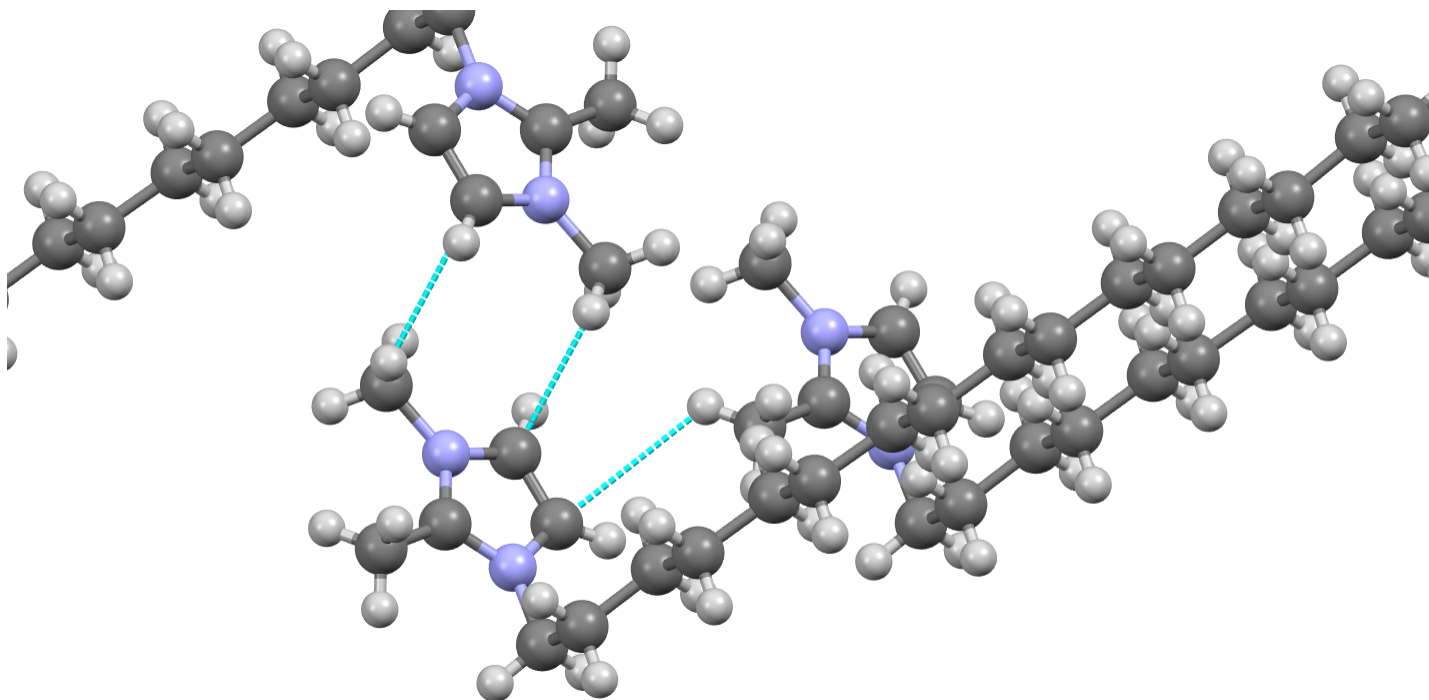

**Figure S2.** Depiction of the  $\text{H}\cdots\text{C}|\text{C}\cdots\text{H}$  interactions in **2**. Image is zoomed in to show only the heterocycle. The cutoff for interactions was set at the sum of the van der Waal radius + 0.2 Å. Longer interactions do also exist.

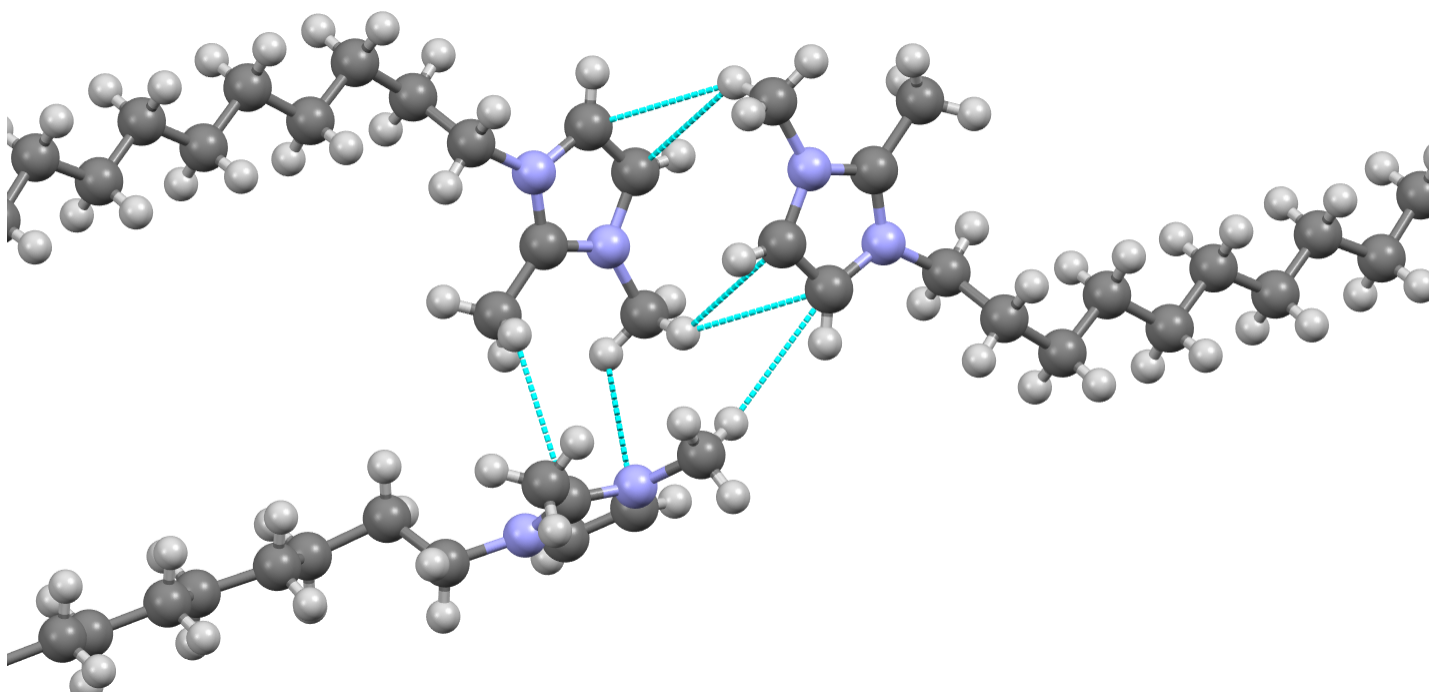

**Figure S3.** Depiction of the  $\text{H}\cdots\text{C}|\text{C}\cdots\text{H}$  interactions in **3**. Image is zoomed in to show only the heterocycle. The cutoff for interactions was set at the sum of the van der Waal radius + 0.2 Å. Longer interactions do also exist.

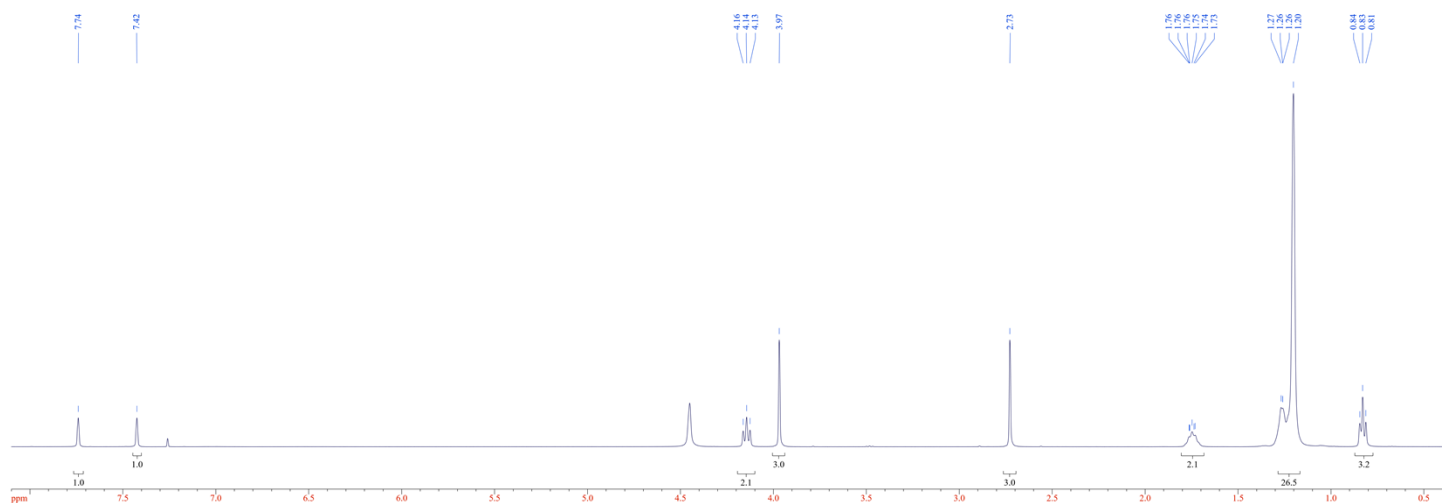

Figure S4. <sup>1</sup>H NMR of Compound 1.

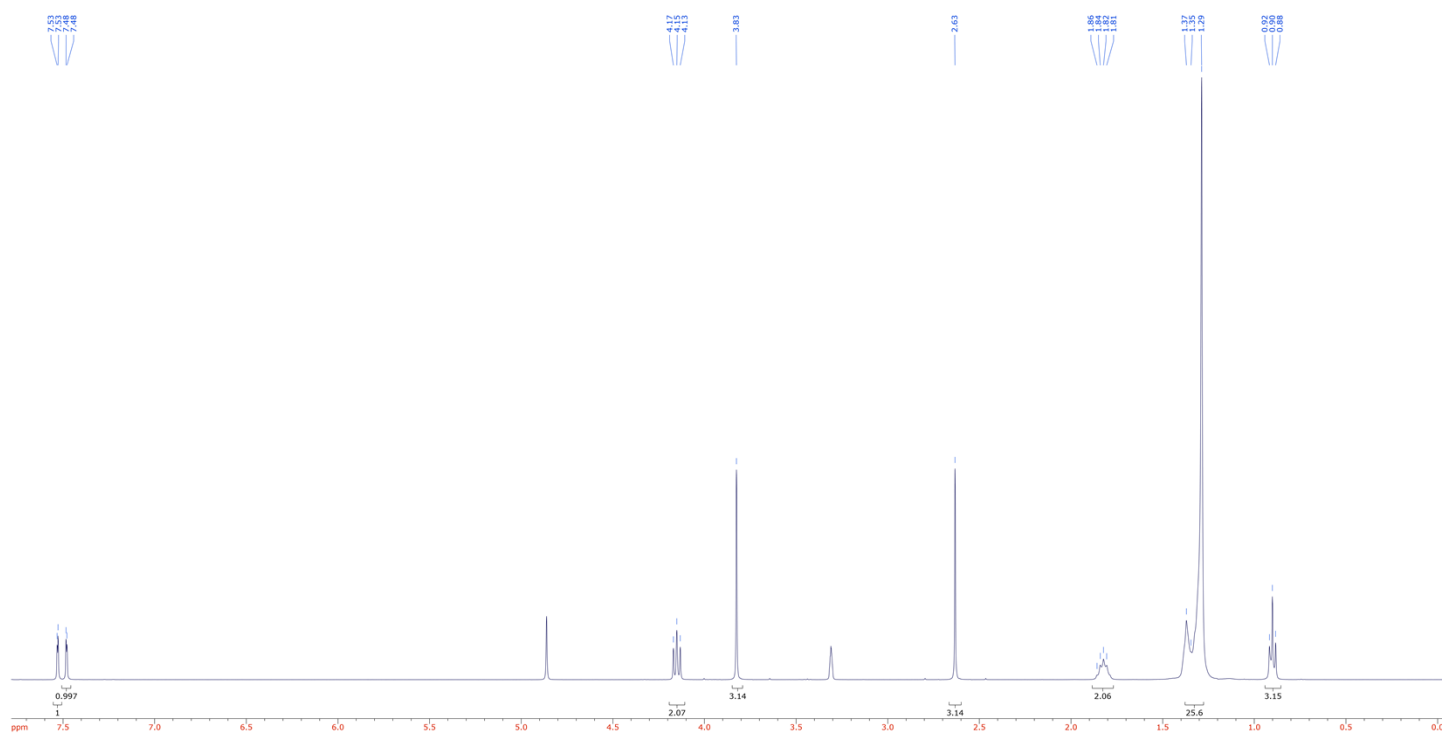

Figure S5. <sup>1</sup>H NMR of Compound 2.

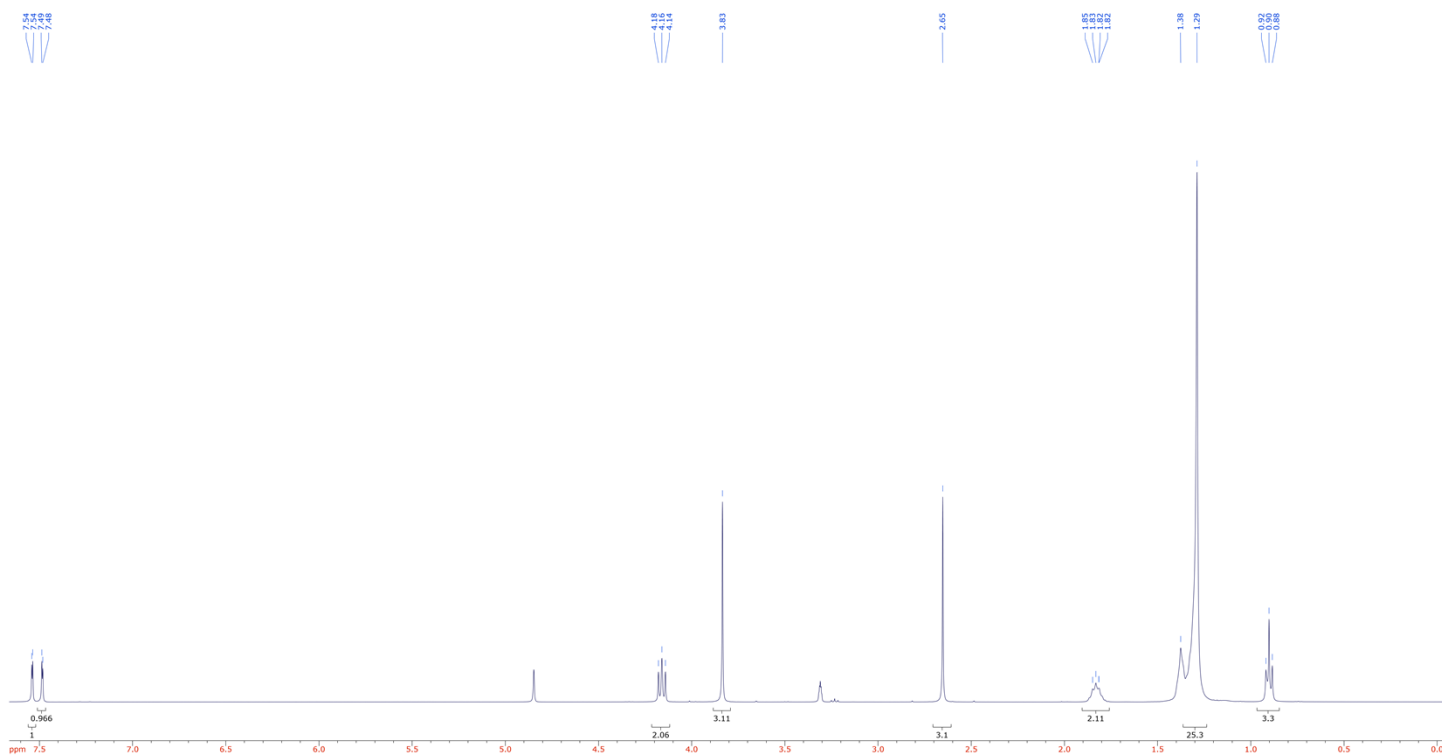

Figure S6. <sup>1</sup>H NMR of Compound 3.

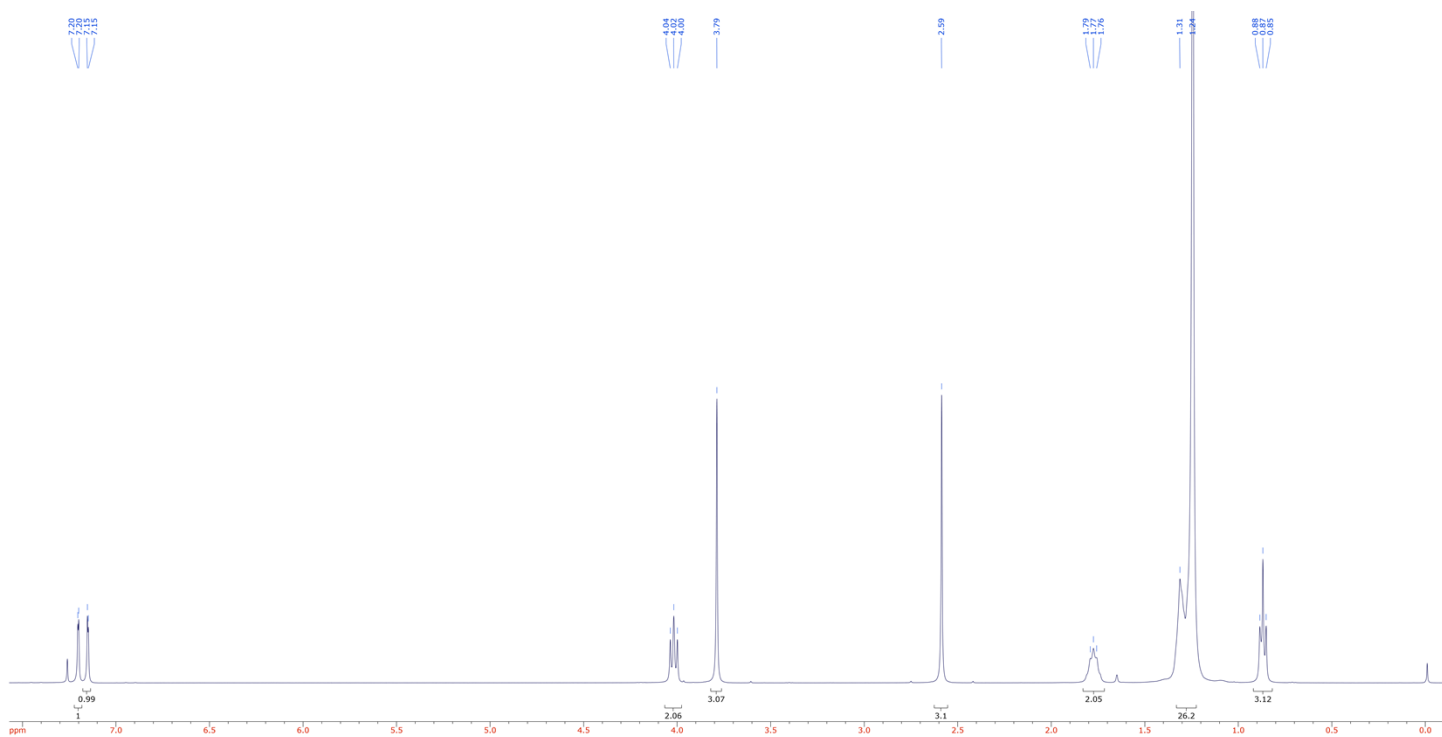

Figure S7. <sup>1</sup>H NMR of Compound 4.

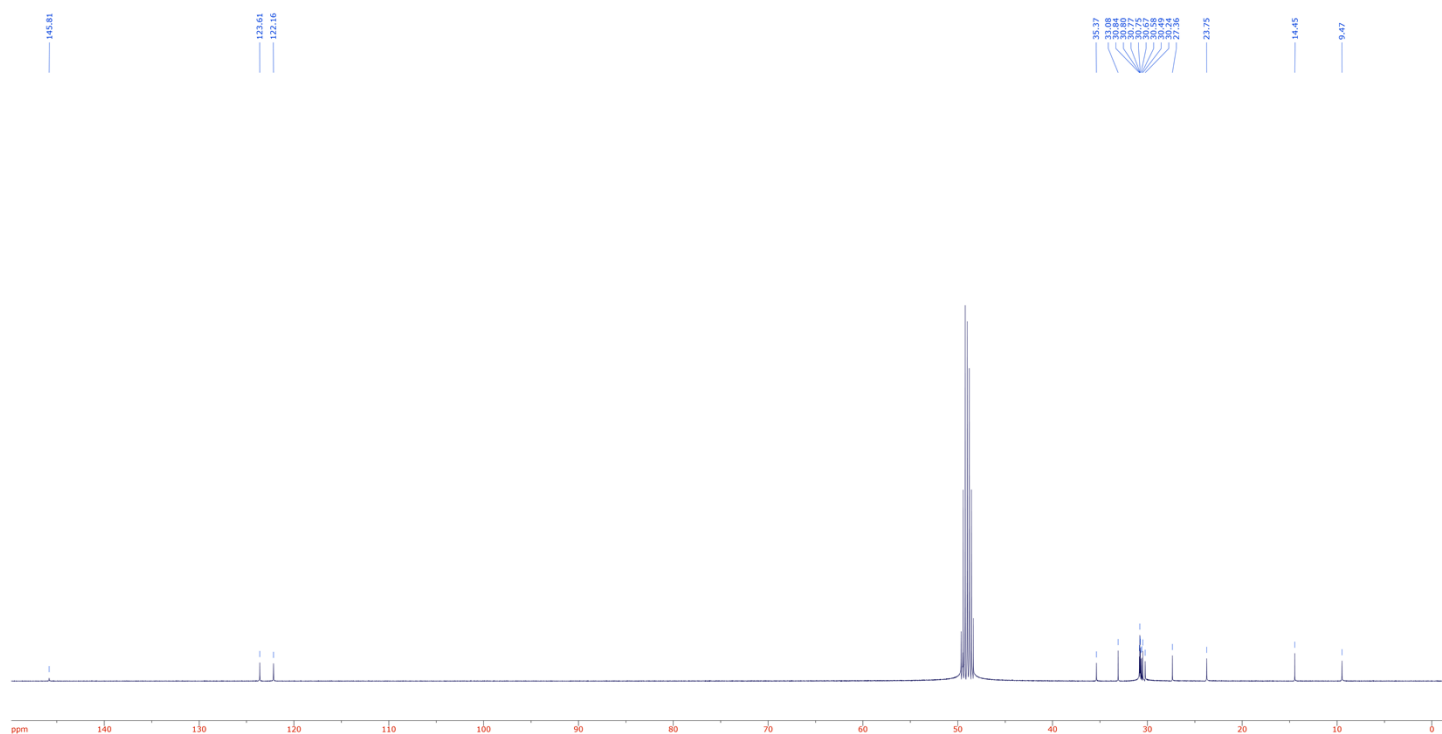

Figure S8. <sup>13</sup>C NMR of Compound 1.

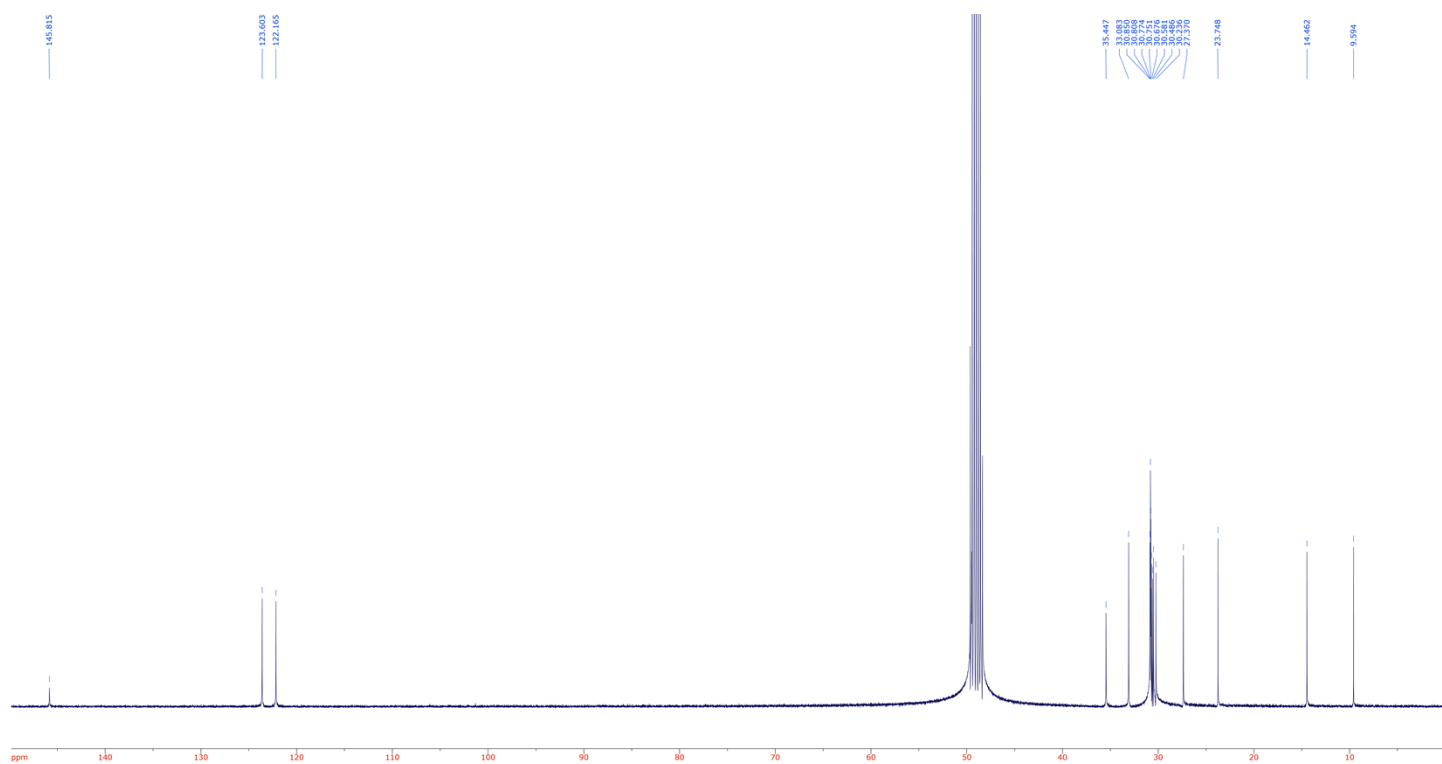

Figure S9. <sup>13</sup>C NMR of Compound 2.

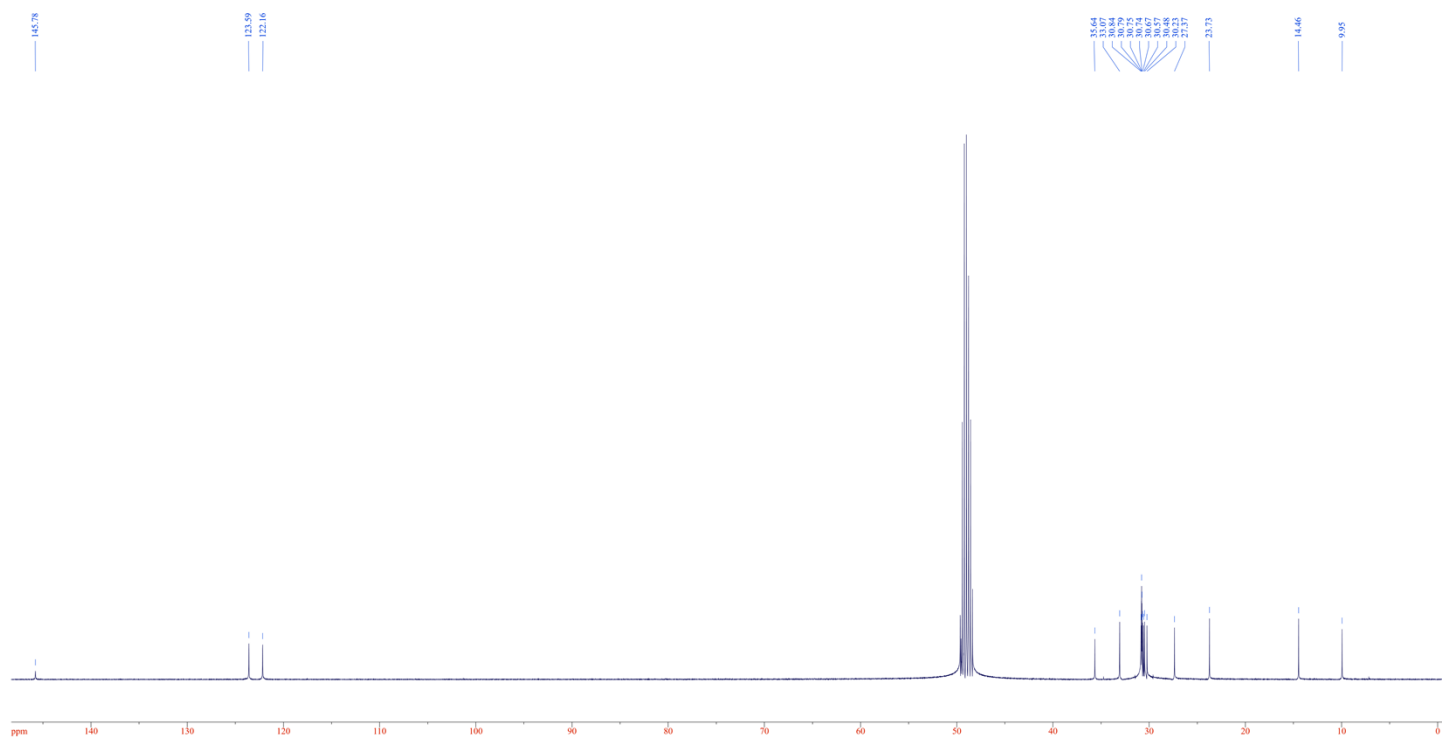

Figure S10.  $^{13}\text{C}$  NMR of Compound 3.

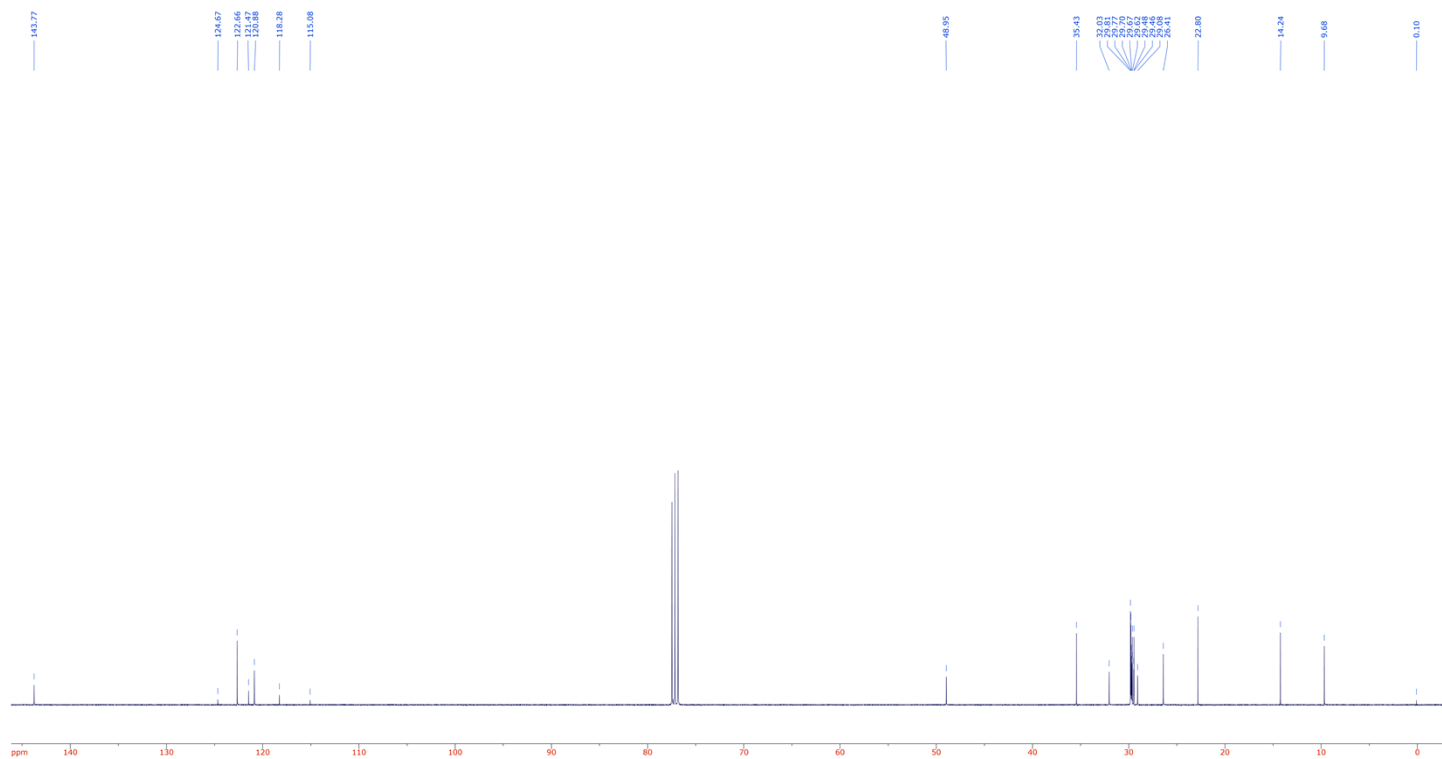

Figure S11.  $^{13}\text{C}$  NMR of Compound 4.

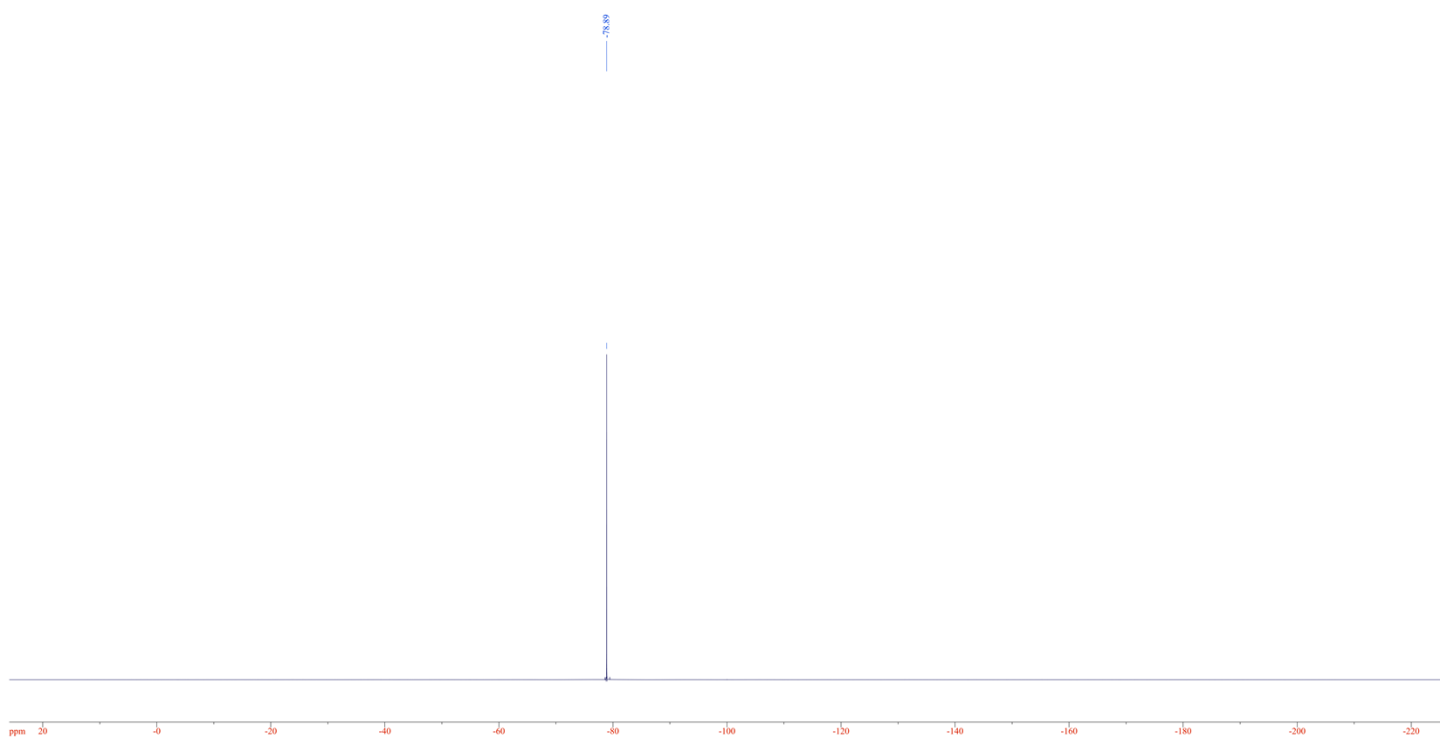

Figure S12.  $^{19}\text{F}$  NMR of Compound 4.
